# Supplementary material for: Safe Steps: A Text Message Intervention to Increase Physical Activity After Emergency Department Discharge in Older Adults
Source: Research Square preprint supplement (doi:10.21203/rs.3.rs-5883387/v1), 2025-02-03
Supplement: Supplementary file 1 [file 02ce5d635bf9ebd348a46c23.docx]

**Messages Libraries**

Low [0< daily step count <= 2000]

1. Small steps every day can lead to big improvements in health. Proud of you for starting this journey.
2. Did you know that walking daily can lower the risk of heart diseases and improve mental well-being? Your health is important!
3. We noticed you're starting on your step journey. Remember, it's not about the count but the consistency. Keep going!
4. Every step you take is a step towards better health. You're doing great, and we're here cheering you on.
5. We know that pain can make it difficult to be as active as you'd like. Studies show that being active can reduce pain.
6. Staying inactive can also affect your mental well-being, increasing risks of depression and anxiety. Walking daily can boost your mood!
7. Walking doesn't have to be a chore. Listen to your favorite music or an audiobook. It can make the experience enjoyable and motivating.
8. Challenge yourself, but always listen to your body. You're doing great!
9. Consistency is key. Even if it's a few more steps each day, that progress adds up. You've got this!
10. We all have our pace, and that's okay. Celebrate every step you take. You're doing wonderfully!
11. Every step counts, literally! Even if 2,000 steps sound daunting, remember it's just a series of small walks. You can do this!
12. Turn chores into steps! Need to vacuum or sweep? It’s a great way to add some steps and keep your home clean.
13. If evenings are better for you, how about a gentle walk to wind down your day? Listen to your body and move when it feels right.
14. Experiencing discomfort or pain while walking is valid. Start slow and consider short, gentle strolls. ***Please consult a doctor if the pain continues***. Your well-being is paramount.
15. Practice balance exercises. They'll improve stability and help you walk confidently.
16. If walking causes discomfort, try wearing comfortable shoes or consider a walking aid. It's important to be safe and comfortable.
17. Setting a gentle reminder or scheduling a walk at the same time daily can help make it a routine. Remember, even a short stroll around the house counts.
18. Notice when your body wants a movement break. Stand up, wiggle your toes, stretch those legs, and discover what's around you. A few minutes of movement can make a big difference.
19. Pairing up with a walking buddy can be a fun way to remember to take your walks. It's a great way to socialize and stay active together.
20. Consider joining a balance or gentle exercise class. It can help improve stability and reduce the fear of falling. Your safety is essential.
21. TV time can be active time! Walk in place or do simple exercises during shows.
22. Walking is also a social activity. Invite a friend or join a local walking group. It's a wonderful way to connect with others while prioritizing your health.
23. It's natural to be concerned about falls. Using non-slip shoes and walking in well-lit areas can boost your confidence. Remember, it's okay to use a walking aid for extra support.
24. Your dedication is admirable, and we're cheering you on. Try to achieve more than 2000 steps per day. We believe in you.
25. Your intention sets the course. Create goals that motivate you and let your determination propel you forward. We're here to support you.
26. Each milestone crossed is a reminder that success is built one step at a time. Celebrate your progress and keep moving forward!
27. Remember, it's not about the distance but the dedication. Keep taking those steps, no matter how small.
28. Having a step goal should feel motivating. Begin with a number that feels comfortable for you, and remember, it's okay to adjust as you go along.

Moderate [2000< daily step count <= 5000]:

1. Fantastic job today! Your steps today are a testament to your dedication. Keep up the great work!
2. Well done! Every step you took today contributes to your overall health and well-being. We're proud of your efforts.
3. You're making steady progress with your steps! Remember, consistency is key. Keep it up!
4. You did wonderfully today! Those steps are not just numbers; they're steps towards better health.
5. Congratulations on your steps today! It's clear that you're putting in the effort, and it's paying off.
6. You're on a fantastic voyage to better health. Keep exploring with every step!
7. Look at you go! Today's step count is a great achievement. Celebrate these moments of progress.
8. Every day is a new opportunity to work on your fitness. You got this!
9. Your step count today is an inspiration. You're proving that every step counts. Keep moving forward!
10. You're doing amazing things for your health with every step. Today's count is proof of your resolve. Way to go!
11. Your steps today are a great balance of effort and care. You're doing a remarkable job in maintaining this momentum. Cheers to you!
12. Incredible work getting some walking in today! Keep those steps coming!
13. You're making impressive strides on your health journey!
14. You're proving that progress comes with persistence. Nice work!
15. Celebrate your daily wins! Today was a day of good movement, keep it going tomorrow.
16. You're walking your way to a healthier you, keep it up!
17. Nice work! Consistency can be your strength – keep stepping towards a better future.
18. You're turning small steps into significant achievements. The results are impressive
19. Every step you take is a victory on your journey to better health.
20. Your step count is the measure of your determination. Celebrate the small wins on your path to greatness!
21. Your steps are the building blocks of a stronger you. Keep constructing!
22. Each and every step is progress on your movement journey. Keep it up!
23. Your steps are a reflection of your commitment to improving your health. Don't lose your forward momentum.
24. With every step, you're writing your own success story. Keep walking and celebrating your journey!
25. Impressive progress on your steps – keep striding to success!
26. Nice work today! Raise the bar and let your step count soar.
27. Boost your energy, mood, and health – one step at a time.
28. Step up, step out, and celebrate the journey of a thousand steps. Each one counts toward your well-being!

High [daily step count > 5000]

1. Outstanding effort! Your step count today is truly commendable. Here's to many more active days like this one.
2. Good job walking. Keep it up!
3. You are on the move today! Keep the momentum going tomorrow.
4. What a milestone! Your high step count today is a testament to your perseverance and drive. Celebrate this achievement.
5. These steps are essential to your health and wellness. Good job!
6. Nice! Great step count!
7. You've outdone yourself today! It's so inspiring to see your commitment in action. Bravo!
8. Your walking is amazing – continue stepping towards your goals!
9. You're on fire! Today's step count is a brilliant reflection of your dedication to staying active. We're incredibly proud of you.
10. Hats off to you! Recording such a high step total is no small feat. Your hard work and determination are paying off.
11. Your efforts today are nothing short of amazing!
12. Keep reaching for the stars with your steps. We're cheering you on every step of the way.
13. Your commitment to staying active is truly motivating. Continue the exemplary work and watch your progress unfold.
14. Fantastic job on achieving this high step count today. Your dedication to health and wellness is truly inspiring.
15. Impressive work on those steps! Maintain that momentum!
16. Your strides today have been outstanding! This high step count is evidence of your commitment and effort. Carry on with the excellent work!
17. Keep walking, keep achieving – you're doing great!
18. ​You are movin’ and groovin’! Nice work!
19. Continue the journey! Walking may be simple, but it's a powerful way to improve your well-being
20. Today's step count looks great. Way to go!
21. Kudos on your walking! Stay the course and remember to celebrate your fitness wins.
22. You're crushing it on daily walking. Strut those steps!
23. Consistency rocks, and so do you! Let those steps grooving!
24. Impressive step count! Strut your stuff and maintain an active lifestyle.
25. You've built a great habit of staying active. Push forward, and you'll observe more positive changes in your energy, fitness, and overall well-being.
26. You did great today! Keep on stepping to even greater heights!
27. Your determination and efforts have paid off. Beautiful job!
28. You did it! Celebrate this success and continue working toward your next milestone!

Supplemental Figure 1: Adherence to Safe Steps Text Messages
